# Supplementary material for: A fur plucking model to study herpes simplex virus reactivation and recurrent disease
Source: PubMed Central journal article supplement — bioRxiv. 2023 Dec 6:2023.12.06.570385. Preprint. [Version 1] doi: 10.1101/2023.12.06.570385 (PMC10723404; doi:10.1101/2023.12.06.570385), 2023-12-06
Supplement: NIHPP2023.12.06.570385V1-supplement-1.pdf [file NIHPP2023.12.06.570385V1-supplement-1.pdf]

153 **SUPPLEMENTARY METHODS**

154 **Viruses and cells.** Virus stocks were grown in Vero (African green monkey kidney epithelial)  
155 cells. Titers of virus stocks were determined on Vero cells by a focus-forming assay (FFA). Vero

156 cells were maintained in Dulbecco's modified Eagle medium (DMEM) containing 5% heat-  
157 inactivated fetal bovine serum (FBS) and L-glutamine at 37°C with 5% CO<sub>2</sub> containing 2% fetal  
158 bovine serum (FBS), L-glutamine, and HEPES at 37°C with 5% CO<sub>2</sub>. HSV-1 strain NS was  
159 obtained from Dr. Harvey Friedman (University of Pennsylvania) (18). HSV-2 strain 333 was  
160 obtained from Dr. Steven Bachenheimer (UNC). Virus stock titers were quantified by focus-  
161 forming assay on Vero cells. Viral foci were detected using 1:10,000 dilution of αHSV rabbit  
162 antibody (Dako #B0114) and 1:50,000 dilution of goat arabbit HRP conjugated antibody (Sigma  
163 #12-348), and TrueBlue peroxidase substrate (KPL). Antibody incubations were performed for at  
164 least 1 hour at room temperature. Foci were counted on a CTL Immunospot analyzer.

165 **Mice.** All experiments and husbandry were performed under the approval of the University of  
166 North Carolina at Chapel Hill Institutional Animal Care and Use Committee. Experiments used 8-  
167 12-week-old male and female mice on a C57BL/6 background, bred in-house. SKH-1 (Charles  
168 River strain #477) were received from Dr. Brian Conlon (UNC) and 10-12 week-old male and  
169 female mice were used for experiments.

170 **HSV skin infections.** One day prior to infection, mice were anesthetized by nose-cone isoflurane  
171 and depilated by plucking on the right flank unless otherwise indicated. One day later, mice were  
172 anesthetized by chamber isoflurane for infections. To perform infections, we abraded the skin of  
173 anesthetized, depilated mice with ~10 closely spaced punctures (~5mm<sup>2</sup> total area) using a  
174 Quintip allergy needle (Hollister Stier #8400ZA). Immediately after abrasion, we overlaid 10 μL of  
175 viral inoculum (virus + 1% FBS in PBS) and allowed the inoculum to dry while mice were  
176 anesthetized.

177 **Viral load measurements.** Viral genomes were quantified from skin that was homogenized in  
178 500 μL of PBS and silica beads on a MagNAlyser instrument (Roche). DNA was then extracted  
179 from 200 μL of homogenate using the Qiagen DNeasy Blood & Tissue Kit (#69504). Extracted  
180 HSV-1 genomes were then quantified by TaqMan qPCR on a CFX96 Touch real-time PCR  
181 detection system (Bio-Rad) against a standard curve generated by extracting DNA from an HSV-

182 1 stock at  $10^8$  FFU/mL and serially diluting. HSV-1 genomes were detected using the following  
183 primers against the UL23 gene: F primer 5'-TTGTCTCCTTCCGTGTTTCAGTT-3', R primer 5'-  
184 GGCTCCATACCGACGATCTG-3', and probe 5'-FAM-CCATCTCCCGGGCAAACGTGC-MGB-  
185 NFQ-3' (19).

186 **Lesion area measurements.** To measure HSV lesion areas, mice were anesthetized and  
187 photographed using an iPhone camera next to a ruler and an identifying card. Thereafter, images  
188 were analyzed using Image J in which pixels were converted to millimeters using the reference  
189 ruler and then lesions were outlined using the freehand tool and calculated areas within the  
190 freehand designations were reported.
